# Supplementary material for: CamOptimus: a tool for exploiting complex adaptive evolution to optimize experiments and processes in biotechnology
Source: PubMed Central journal article supplement (PMC5817226; doi:10.1099/mic.0.000477), 2017-06-21
Supplement: mic-163-829-s001.pdf [file mic-163-829-s001.pdf]

1 CamOptimus: A Tool for Exploiting Complex Adaptive Evolution to Optimise Experiments  
2 and Processes in Biotechnology

3 Ayca Cankorur-Cetinkaya, Joao M L Dias, Jana Kludas, Nigel K.H. Slater, Juho Rousu,  
4 Stephen G. Oliver\*, Duygu Dikicioglu

## 5 **Supplementary Material**

### 6 **Text S1. Supplementary information on test case**

#### 7 **Data S1. Raw data for GA and 4 batches of 10 models in SR for each individual** 8 **objective**

9 This spreadsheet is comprised of 4 tabs each dedicated to the batch of 10 “evolutions”  
10 achieved for a specific objective of the combined objective function; final cell density during  
11 the growth-promoted phase (ODbi tab), further growth during the protein production phase  
12 (ODai-ODbi tab), enzyme activity (Ea tab), and specific productivity (SP tab). The models  
13 and the cognate  $R^2$  values are provided along with the individual compositions in the  
14 “population” in 3 “generations” and the experimental values measured for each individual  
15 objective.

### 16 **Movie S1. Demo video for CamOptimus**

17

### 18 **Text S1**

#### 19 **Determination of the biological objectives for recombinant protein production under** 20 **inducible promoters**

21 The expression system employed made use of a strong methanol-inducible promoter to  
22 promote recombinant protein production and suggested that the fermentation should be  
23 divided into two main phases. The culture should first undergo a biomass-generation phase,  
24 in which the maximum possible cell density would be attained for use in the second, product-  
25 generation phase. In this second phase, metabolic flux should be directed away from cell

26 growth and towards the production of the recombinant protein once its synthesis had been  
27 induced. This fermentation regime suggested that four main biological objectives should be  
28 selected for our system: (i) maximising cell density prior to induction of recombinant protein  
29 synthesis, (ii) maximising the biological activity of the recombinant enzyme at the end of the  
30 fermentation, (iii) maximising the culture's specific productivity, and (iv) minimising any  
31 further increase in cell density during the induction phase.

32

### 33 **Selection of factors and their boundaries to be employed in GA**

34 Published concentrations of medium components that acted as the major nitrogen, potassium,  
35 magnesium, and calcium sources in *K. phaffii* varied substantially in studies employing  
36 different clones or different growth strategies [1–4]. Among the micronutrients, iron  
37 displayed the largest variation in concentration between different defined medium recipes  
38 [4,5]. Cells that employ the *AOX* promoter to express the recombinant protein have usually  
39 been cultivated on sorbitol or glycerol prior to induction, with a co-feeding strategy based on  
40 methanol/sorbitol mixtures employed during the induction period [3, 6]. Preliminary shake-  
41 flask experiments revealed that HuLy activity was lost from batch cultures whose pH was not  
42 controlled throughout the course of the fermentation, and so pH was included as another  
43 factor to be optimised.

44 The maximal and the minimal concentrations of medium components previously reported in  
45 the literature were used to set the allowable ranges for each factor [4,5,7–9] Although pH  
46 values between 5 and 6 have been used in most studies, *K. phaffii* can grow in a wide range  
47 pH from 3 to 7 [10]. The pH of the culture can affect proteolytic activity, secretion, and  
48 protein production [11]; therefore, we kept the pH range as wide as possible in order to  
49 identify the optimum value for HuLy production.

50

## 51 **Investigation of the effect of the citrate/phosphate buffer on culture performance**

52 The effect of the addition of buffer components to maintain constant pH on the growth and  
53 production characteristics of the culture was investigated at different stages of the analysis.  
54 Preliminary analysis involved growing the microbial culture in shake flasks, where the  
55 culture pH was maintained constant in buffered conditions, or was allowed to decrease in  
56 non-buffered defined medium. The protein activity diminished in cultures where the pH was  
57 not kept constant, thus demonstrating the necessity for pH control. For the operating  
58 conditions investigated in this study, the working pH was in the range of 3-7.  
59 Citrate/phosphate buffer, with reported functionality in the pH range of 2.6-7 [12], was  
60 selected as a suitable option for our purposes, since its constituents did not pose a threat of  
61 toxicity for the culture. Since citric acid and dibasic sodium phosphate were used to prepare  
62 the buffer, possible interference due to buffer components acting as macronutrients was  
63 investigated to rule out such complications. Varying the concentration of citric acid (5-fold)  
64 to account for the possible variation it would display in the pH range of 2.6 – 7 (<5-fold) did  
65 not yield a change in growth or protein activity. In order to investigate the effect of the  
66 phosphate group acting as a macronutrient, a similar experiment was carried out as described  
67 for testing the effect of the citrate component of the buffer. Furthermore, in order to test the  
68 phosphate group specificity of the analysis, dibasic sodium phosphate was replaced by  
69 sodium sulphate, to provide equivalent Na molarities. The difference in growth or protein  
70 activity always remained within 10% of one another and that of the reference study,  
71 regardless of the concentrations employed within the limits that were of interest for the  
72 purpose of this study (Table A). Therefore the citrate/phosphate buffer was considered as an  
73 acceptable option for the cultivations performed in snap-cap tubes. Throughout the  
74 evolutionary procedure, the pH of randomly selected cultures was measured in order to  
75 ensure that the buffer was working satisfactorily. The complete data collected over three

76 generations were investigated for the possible existence of any correlation between any single  
77 objective and the buffer components individually and no trends were detected with all  
78 regression coefficients ( $R^2$ ) remaining  $<0.10$  (Figure A). We then extended our investigation  
79 of the citrate component further by tracing any possible indication that its chelating properties  
80 impacted on the availability of calcium or iron, both of which were under consideration  
81 within the scope of this work. Despite earlier reports on the calcium- and iron-chelating  
82 properties of citric acid [13], the concentrations employed in the study were shown not to  
83 cause such an effect throughout the course of the study, with the Pearson correlation  
84 coefficients for both cases remaining below 0.3 and the regression coefficients below 0.1  
85 (Figure B).

86 **Table A. Effect of buffer components on growth and protein production.**

|                                                      | <b>% change in OD</b> | <b>% change in HuLy activity</b> |
|------------------------------------------------------|-----------------------|----------------------------------|
| <b>Citric acid supplementation</b>                   | 2.362                 | 8.456                            |
| <b>NaH<sub>2</sub>PO<sub>4</sub> supplementation</b> | 5.133                 | 7.730                            |
| <b>Na<sub>2</sub>SO<sub>4</sub> supplementation</b>  | 7.605                 | 4.351                            |

87

88

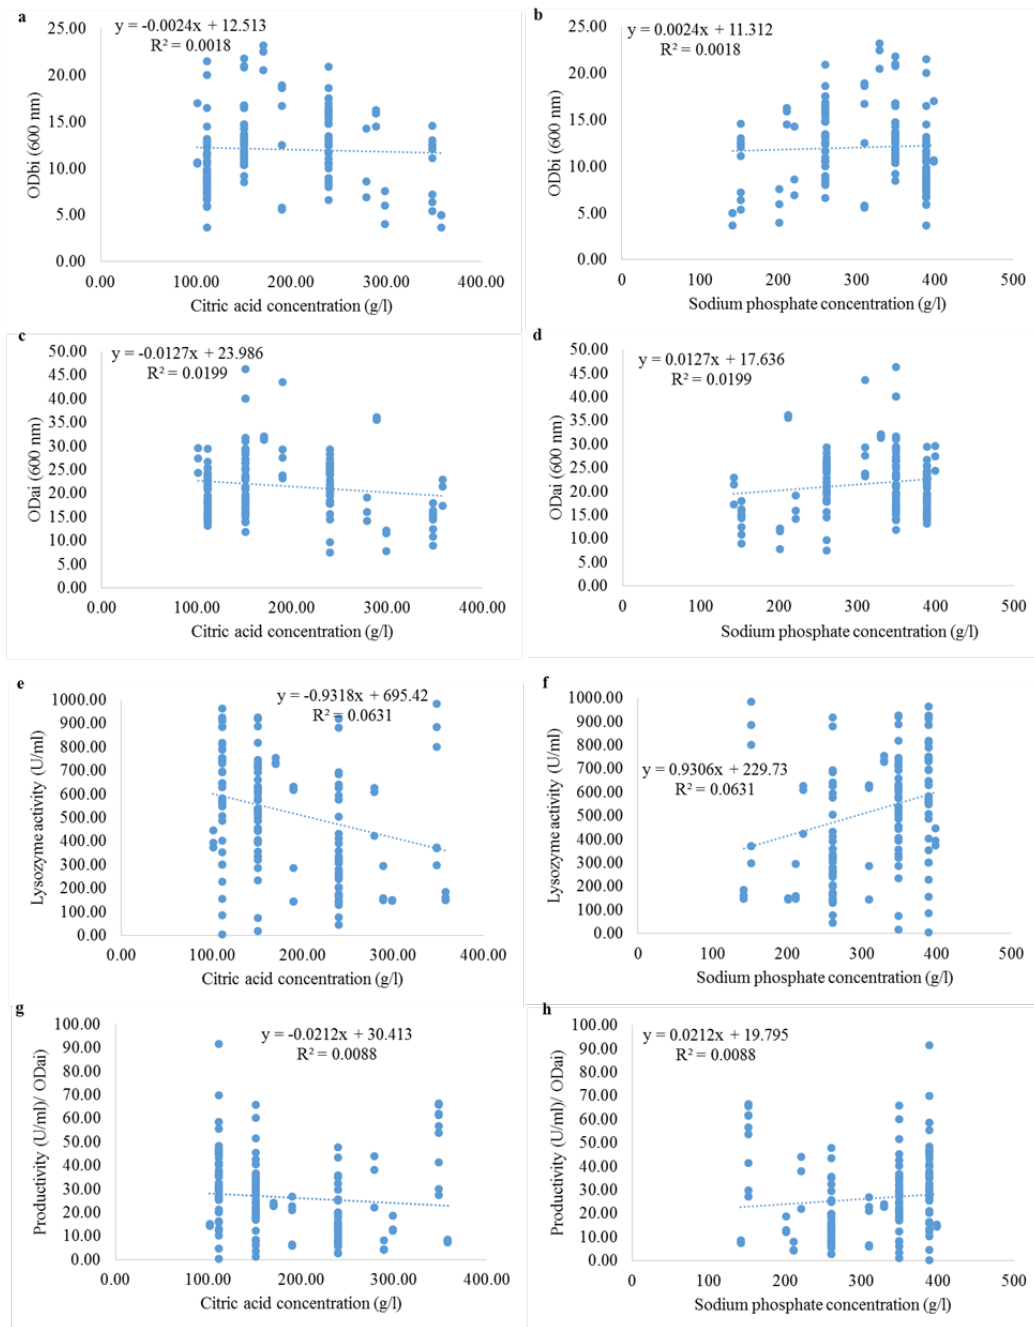

89

90 **Figure A. Investigation of the possible correlation between individual objectives and the**  
 91 **concentration of the buffer components.**

92 Complete data set comprised of all measured objectives over three generations. The changes  
 93 in biomass during the growth promoted phase (OD<sub>bi</sub>) as a function of citric acid concentration  
 94 (a) or dibasic sodium phosphate concentration (b), the final biomass attained (OD<sub>ai</sub>) as a  
 95 function of citric acid concentration (c) or dibasic sodium phosphate concentration (d), the  
 96 HuLy activity as a function of citric acid concentration (e) or dibasic sodium phosphate

97 concentration (f), and the culture productivity as a function of citric acid concentration (g) or  
98 dibasic sodium phosphate concentration (h) are provided along with their linear regression  
99 models and  $R^2$  is provided as a goodness-of-fit measure.

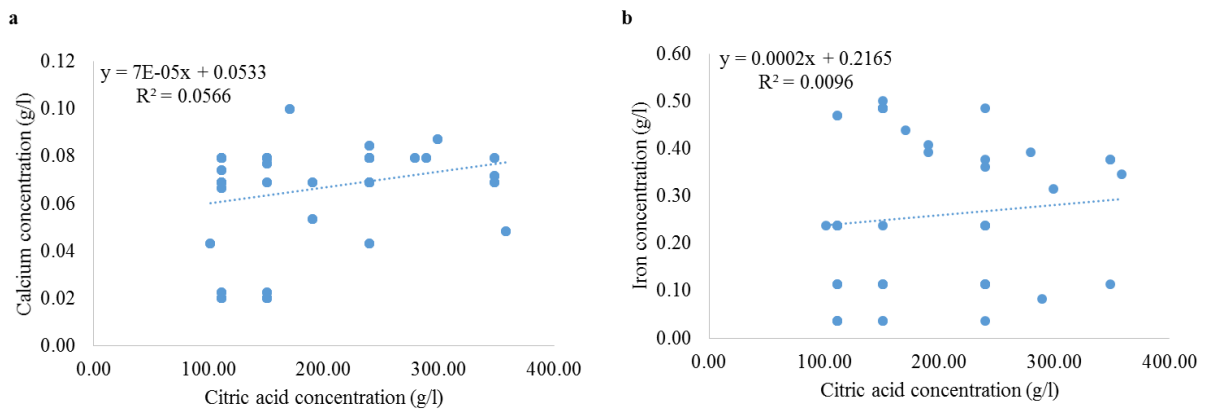

100

101 **Figure B. Investigation of the possible chelation effect of citric acid on calcium and iron**  
102 **in the cultivation medium.**

103 Distribution of calcium (a) and iron (b) concentrations tested over three generations as a  
104 function of the citric acid concentrations of the corresponding sample. Any possible trends  
105 and correlations were investigated by fitting linear models ( $R^2$  as a goodness-of-fit measure).  
106 The slopes of the models indicating the existence of possible trends were negligibly small.

107

108 **Fine-tuning the global optimum by population profiling**

109 We carried out fine-tuning of the optimised environmental conditions that we had obtained at  
110 the end of the 3<sup>rd</sup> “generation” in the GA study by employing a population profiling  
111 methodology to determine whether the performance of the system could be improved even  
112 further. We investigated the change in how many individuals assumed each level over the 3  
113 “generations” for each one of the 9 factors (Figure 2). We calculated the percent occupancy  
114 of the levels in the better-performing, i.e. the “fitter” fraction of the “population” in the last  
115 “generation”, which corresponded to the half of the “population” with the highest “fitness”

116 scores, and employed this as a footprint for identifying the optimal levels for each factor  
117 (Figure C). The footprints of methanol, sorbitol and pH in the 3<sup>rd</sup> “generation”, as well as  
118 their convergence profiles through the course of the GA search, indicated that the levels that  
119 these factors assumed converged towards unique values at 6.75g/L, 7.60g/L and 6.74,  
120 respectively (Figure 2(a-c) and Figure C(a-c)). In the case of ammonium, potassium and  
121 glycerol, although the convergence profiles displayed bi-modal behaviour, the footprints in  
122 the 3<sup>rd</sup> “generation” indicated a pronounced convergence towards unique levels at 6.55 g/L,  
123 3.21 g/L and 9.87 g/L, respectively (Figure 2(d-f) and Figure C(d-f)). The convergence of the  
124 footprint distribution for the remaining 3 factors either were not as pronounced, e.g. iron  
125 (Figure C(g)), or displayed bi-modal behaviour, e.g. calcium and magnesium (Figure C(h-i)).  
126 The optimal concentration of FeSO<sub>4</sub>·7(H<sub>2</sub>O) was determined as 0.04 g/L. The distribution of  
127 the frequency of the level occupation over successive generations was investigated for the  
128 factors, whose footprints displayed bi-modal distributions. The level of 0.07g/L for  
129 CaCl<sub>2</sub>·2(H<sub>2</sub>O) was employed more frequently in the “population” as the search approached  
130 the 3<sup>rd</sup> generation (Figure C(h)) and therefore this level was selected as the optimal  
131 concentration for CaCl<sub>2</sub>·2(H<sub>2</sub>O). A similar inspection of the progression of the population  
132 profiles for MgSO<sub>4</sub>·7(H<sub>2</sub>O) indicated that two distinct levels were more frequently adopted as  
133 the system evolved towards an optimum (Figure C(i)). Therefore, both levels were tested  
134 experimentally to identify the better performing condition. The lower of these two levels  
135 improved the activity of the secreted HuLy enzyme and the specific productivity by nearly  
136 20- and 15-fold, respectively. The adoption of the lower value also resolved issues related to  
137 the medium precipitating, thus substantially improving reproducibility. The MgSO<sub>4</sub>·7·H<sub>2</sub>O  
138 level for the optimal “individual” was selected as 2.37g/L.

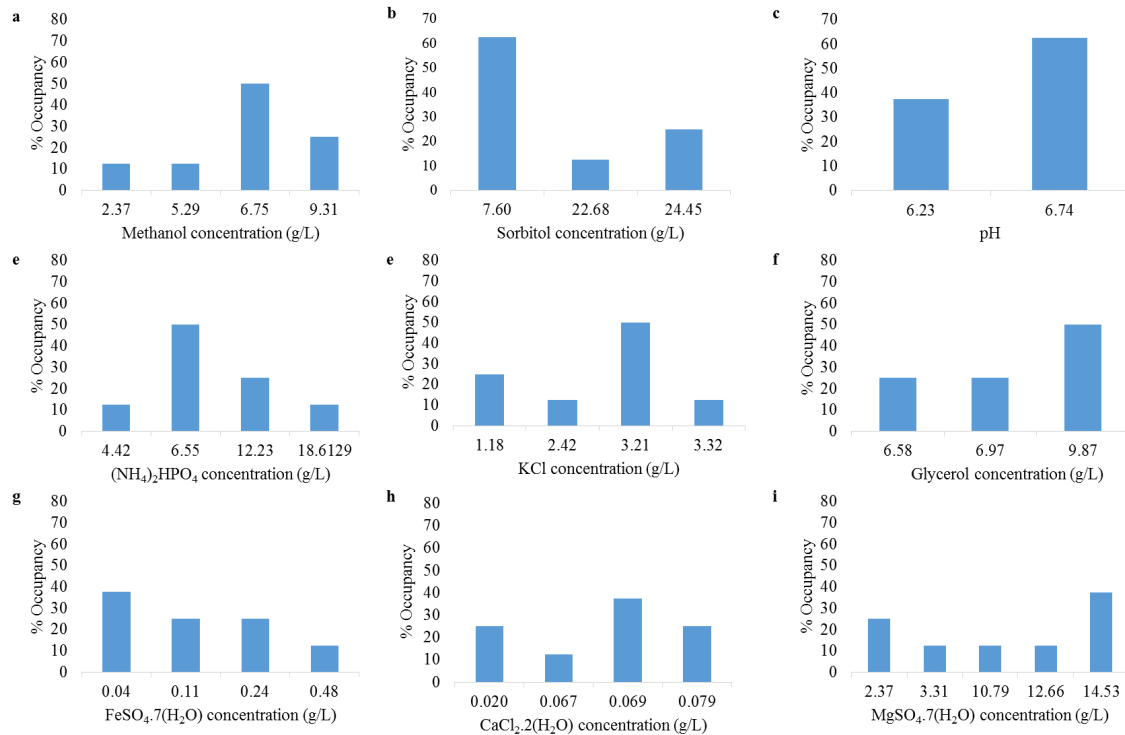

139

140 **Figure C. Relative occupancy of the levels of each factor in the better performing**  
 141 **fraction of the 3<sup>rd</sup> generation**

142 Relative occupancy of the levels assigned in the better performing fraction are displayed (i.e.  
 143 the 50% of the population with the highest “fitness” scores, of the 3<sup>rd</sup> generation for each  
 144 factor). Methanol (a), sorbitol (b), pH (c), (NH<sub>4</sub>)<sub>2</sub>PO<sub>4</sub> (d), KCl (e), glycerol (f), FeSO<sub>4</sub>·7(H<sub>2</sub>O)  
 145 (g), CaCl<sub>2</sub>·2(H<sub>2</sub>O) (h), and MgSO<sub>4</sub>·7(H<sub>2</sub>O) (i). The footprint was generated by plotting the  
 146 relative distribution of the instances a given level was employed in the better-performing half  
 147 of the 3<sup>rd</sup> generation. The levels, which appeared at least once in the last generation, is  
 148 displayed on the abscissa and the % occupancy, indicating the relative representation of each  
 149 level, is displayed in the ordinate.

150 **Challenging the optimised cultivation conditions against the existing conditions**

151 Buffered minimal medium, containing yeast nitrogen base, and defined medium [4,14] were  
 152 frequently reported as the cultivation environment for *K. phaffi* strains expressing



153 recombinant proteins under the control of the AOX promoter. pH values between 5 and 6 are  
154 used in most studies involving *K. phaffii* fermentations [10]. We challenged the optimised  
155 environmental conditions against these commonly employed conditions to assess the  
156 performance of the methodology. We showed that the activity of the secreted enzyme in the  
157 culture could be increased by 30% and 80% through adopting the optimised conditions to  
158 replace minimal medium buffered at pH 6 and defined medium buffered at pH 5, respectively  
159 (Figure D).

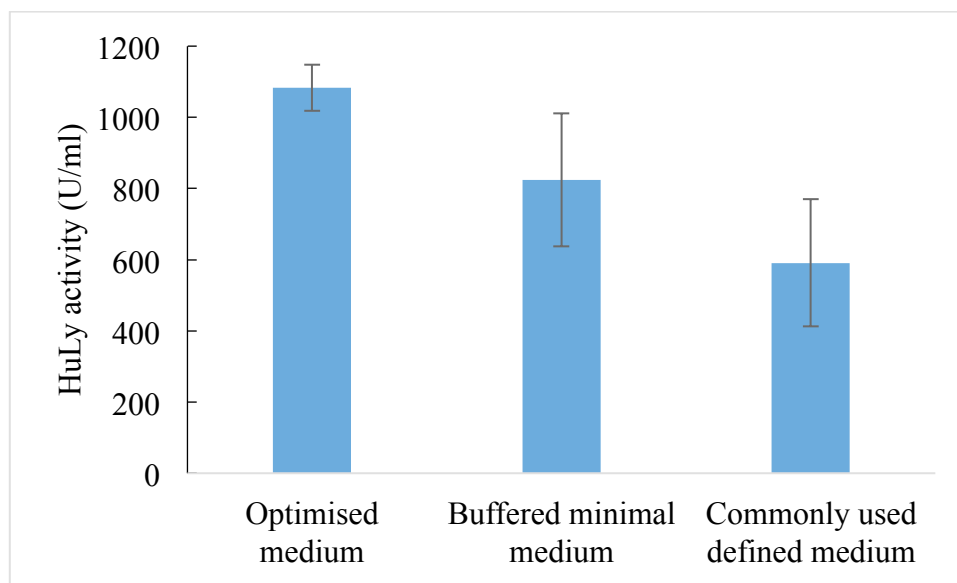

160

161 **Figure D. Challenging the performance of *K. phaffii* cultivated under optimised**  
162 **conditions.**

163 The error bars represent the variation between the technical triplicates. The variation in the  
164 cultures investigated under the optimised conditions was the lowest among the three different  
165 cultivation conditions that were tested.

#### 166 **Determination of Population Size and Number of Generations for SR Analyses**

167 In order to identify the suitable parameter setting, regression analyses were conducted for a  
168 number of combinations of population size and generation number to model the protein

169 activity (Table B). The goodness of fit values were provided as an average of 3 independent  
170 simulations for each setting.

171 **Table B.** Effect of Population Size and Number of Generations on Goodness of Fit

| Population Size | Number of Generations | Goodness of Fit of the Model |
|-----------------|-----------------------|------------------------------|
| 100             | 100                   | 0.772±0.022                  |
| 100             | 500                   | 0.799±0.007                  |
| 500             | 100                   | 0.811±0.018                  |
| 500             | 500                   | 0.814±0.012                  |
| 500             | 1000                  | 0.795±0.025                  |
| 1000            | 500                   | 0.796±0.032                  |
| 1000            | 1000                  | 0.810±0.014                  |

172

173 **Sensitivity of each objective to each factor as determined by SR models**

174 Growth yield during the protein production phase was determined to be highly sensitive to  
175 changes in the concentrations of glycerol and ammonium in the cultivation environment. This  
176 was an expected outcome since both the preferred carbon source (glycerol) and the preferred  
177 nitrogen source (ammonium) become limiting during that phase in the fed-batch culture  
178 leading to incremental changes that are readily reflected in the growth yield. Enzyme activity  
179 was also highly sensitive to the variations in the availability of glycerol and ammonium since  
180 the production of the recombinant protein necessitated competing with growth for the  
181 available resources. In addition, enzyme activity was also highly sensitive to variations in  
182 methanol concentration, which was also expected since the production system was activated  
183 by methanol inducing the alcohol oxidase promoter. Specific productivity, a compound  
184 objective, was highly sensitive to variations in all potential carbon sources; both available

185 (methanol and sorbitol), and unavailable (glycerol) during the protein production phase.  
186 Additionally, we identified specific productivity to be highly sensitive to variations in the  
187 concentration of calcium. This was an unexpected outcome since Human Lysozyme has been  
188 reported not to bind calcium [15]. Moreover, calcium was reported to merely contribute to the  
189 stability of calcium-binding lysozymes [16]. The results highlighted here may suggest the  
190 existence of a possible universal role for calcium for the lysozyme family, which requires  
191 further investigation. The models constructed in this study were not able to capture the  
192 variance in the objectives that was caused by potassium, iron, or magnesium since none of  
193 the objectives were identified to be sensitive to variations in either one of these predictors.  
194 Specifically, magnesium was not included as a predictor in many of the constructed models  
195 (Figure E) and the bi-modal distribution of its levels in the search-space of the GA was  
196 thought to contribute to that effect.

197

|           |                       | model 1   | model 2  | model 3  | model 4 | model 5 | model 6 | model 7 | model 8 | model 9 | model 10 |       |
|-----------|-----------------------|-----------|----------|----------|---------|---------|---------|---------|---------|---------|----------|-------|
| a         | OD bi                 | Ammonium  | 0.89     | 0.29     | 1.28    | 0.85    | 0.00    | 1.53    | 1.64    | 0.32    | 1.16     | 0.09  |
|           |                       | Potassium | 1.56     | 0.66     | 3.10    | 2.45    | 2.98    | 2.10    | 0.43    | 2.70    | 0.16     | 5.61  |
|           |                       | Magnesium | 1.04     | 0.14     | 1.01    | 1.89    | 0.17    | 0.51    | 0.26    | 0.84    | N/A      | 0.05  |
|           |                       | Iron      | 3.15     | 0.05     | 0.01    | 0.04    | 2.77    | 4.25    | 2.54    | 0.08    | 1.61     | 0.06  |
|           |                       | Calcium   | 1.89     | 1.02     | 1.66    | 1.77    | 2.07    | 2.90    | N/A     | 0.08    | 0.57     | 1.69  |
|           |                       | Glycerol  | 0.03     | 3.56     | 1.82    | 0.40    | 9.85    | 6.14    | N/A     | 0.95    | 9.57     | 0.20  |
|           |                       | pH        | 31.30    | 61.03    | 98.32   | 29.67   | 23.10   | 48.18   | 52.06   | 12.71   | 96.50    | 94.58 |
|           |                       | b         | OD ai-bi | Ammonium | 6.37    | 12.62   | N/A     | 0.19    | 0.57    | 0.45    | N/A      | 0.03  |
| Potassium | 1.54                  |           |          | 0.64     | 0.95    | 0.07    | 4.56    | 0.45    | 3.84    | 0.19    | 1.68     | 3.98  |
| Magnesium | 0.02                  |           |          | 0.38     | 0.99    | 1.71    | 0.15    | 2.08    | 0.47    | 0.55    | 0.06     | 1.36  |
| Iron      | 3.19                  |           |          | 0.15     | 0.13    | 0.04    | 3.94    | 0.03    | 0.24    | 0.13    | 0.26     | 0.55  |
| Calcium   | N/A                   |           |          | 0.66     | 1.77    | 1.42    | 0.80    | 3.04    | 4.06    | 0.43    | 4.54     | 2.15  |
| Glycerol  | 1.69                  |           |          | 41.97    | 8.72    | 5.28    | 4.32    | 0.70    | 15.27   | 6.08    | 15.00    | 21.16 |
| Methanol  | 3.71                  |           |          | 2.13     | 0.11    | 2.61    | 3.10    | 4.87    | N/A     | 0.08    | N/A      | N/A   |
| Sorbitol  | 0.11                  |           |          | 1.43     | 0.56    | 3.40    | 1.12    | 3.30    | 0.06    | 1.66    | 0.66     | 3.97  |
| pH        | 0.49                  | 15.67     | 14.58    | 0.08     | 5.01    | 5.34    | 0.92    | 2.19    | 5.08    | 11.13   |          |       |
| c         | Enzyme activity       | Ammonium  | 1.06     | 0.96     | 5.68    | 16.19   | 4.65    | 0.20    | 1.30    | 0.20    | 1.48     | 1.07  |
|           |                       | Potassium | 0.70     | 0.06     | 2.81    | 0.76    | 1.27    | 0.98    | 0.76    | 0.95    | 0.87     | 0.51  |
|           |                       | Magnesium | N/A      | N/A      | 0.33    | N/A     | 0.30    | 0.19    | 0.10    | 0.09    | N/A      | 0.65  |
|           |                       | Iron      | 2.65     | 0.04     | 0.08    | 2.40    | 1.58    | 3.89    | 1.01    | 2.19    | 4.00     | 1.47  |
|           |                       | Calcium   | 3.63     | 0.78     | 0.93    | 2.64    | 7.07    | 0.38    | 2.58    | 2.14    | 0.96     | 0.16  |
|           |                       | Glycerol  | 9.63     | 10.77    | 8.22    | 0.92    | 6.96    | 18.13   | 11.97   | 8.80    | 20.90    | 5.63  |
|           |                       | Methanol  | 29.24    | N/A      | 5.22    | 3.14    | 2.97    | 9.98    | 0.31    | 0.13    | 13.17    | 4.39  |
|           |                       | Sorbitol  | 1.05     | 2.90     | 1.17    | 1.10    | 0.14    | 6.20    | 1.35    | 0.47    | 1.33     | 0.02  |
| pH        | 28.12                 | 49.58     | 6.77     | 6.75     | 11.33   | 24.25   | 8.17    | 29.43   | 26.87   | 2.78    |          |       |
| d         | Specific productivity | Ammonium  | 5.11     | 1.28     | 0.95    | 1.58    | 3.96    | 1.21    | 0.66    | 5.79    | 0.99     | 2.16  |
|           |                       | Potassium | 1.87     | 4.51     | 0.29    | 1.70    | 0.41    | 1.63    | 0.01    | 0.20    | 4.22     | 0.13  |
|           |                       | Magnesium | 0.16     | N/A      | N/A     | N/A     | N/A     | N/A     | 0.02    | 0.55    | 0.08     | 0.10  |
|           |                       | Iron      | 0.01     | 0.15     | 3.01    | 2.76    | 2.31    | 0.37    | 0.57    | 0.05    | 4.20     | 3.44  |
|           |                       | Calcium   | N/A      | 0.25     | 1.39    | 0.03    | 0.67    | 0.20    | N/A     | 0.30    | 10.61    | 1.26  |
|           |                       | Glycerol  | 7.12     | 17.22    | 9.72    | 3.13    | 2.59    | 11.69   | 4.19    | 6.35    | 22.04    | 0.09  |
|           |                       | Methanol  | 2.73     | 7.99     | 35.51   | 3.55    | 3.07    | 2.94    | 61.94   | 60.90   | 5.34     | 7.63  |
|           |                       | Sorbitol  | 85.25    | 2.02     | 2.79    | 3.45    | 0.15    | 2.29    | 0.01    | 4.82    | 23.42    | 2.99  |
| pH        | 3.69                  | 11.66     | 29.83    | 2.70     | 8.53    | 8.37    | 60.81   | 64.46   | 7.79    | N/A     |          |       |

198

199 **Figure E. Heat map of the sensitivity of each individual objective to variations in each**  
200 **individual factor in the model pools**

201 The sensitivity of each objective [final cell density during the growth-promoted phase (ODbi)  
202 (a), further growth during the protein production phase (ODai-ODbi) (b), enzyme activity  
203 (Ea) (c) and specific productivity (SP) (d)] to a variation in the value of each factor of  $\pm 10\%$ .

204 The shade of green denotes the strength of the response, the corresponding values  
205 numerically denote its strength, in percent terms, for each model.

206

## 207 References

- 208 1. **Cos O, Ramón R, Montesinos JL, Valero F.** *Operational strategies, monitoring and*  
209 *control of heterologous protein production in the methylotrophic yeast Pichia pastoris*

- 210 *under different promoters: a review. Microb Cell Fact.* 2006;5:17.
- 211 2. **Gach JS, Maurer M, Hahn R, Gasser B, Mattanovich D, et al.** *High level*  
212 *expression of a promising anti-idiotypic antibody fragment vaccine against HIV-1 in*  
213 *Pichia pastoris. J Biotechnol.* 2007;128(4):735–46.
- 214 3. **Hesketh AR, Castrillo JI, Sawyer T, Archer DB, Oliver SG.** *Investigating the*  
215 *physiological response of Pichia (Komagataella) pastoris GS115 to the heterologous*  
216 *expression of misfolded proteins using chemostat cultures. Appl Microbiol Biotechnol.*  
217 *2013;97(22):9747–62.*
- 218 4. **Prielhofer R, Maurer M, Klein J, Wenger J, Kiziak C, et al.** *Induction without*  
219 *methanol: novel regulated promoters enable high-level expression in Pichia pastoris.*  
220 *Microb Cell Fact.* 2013;12(1):5.
- 221 5. **Delic M, Mattanovich D, Gasser B.** *Monitoring intracellular redox conditions in the*  
222 *endoplasmic reticulum of living yeasts. FEMS Microbiol Lett.* 2010;306(1):61–6.
- 223 6. **Niu H, Jost L, Pirlot N, Sassi H, Daukandt M, et al.** *A quantitative study of*  
224 *methanol/sorbitol co-feeding process of a Pichia pastoris Mut<sup>+</sup>/pAOX1-lacZ strain.*  
225 *Microb Cell Fact.* 2013;12(1):33.
- 226 7. **Baumann K, Maurer M, Dragosits M, Cos O, Ferrer P, Mattanovich D.** *Hypoxic*  
227 *fed-batch cultivation of Pichia pastoris increases specific and volumetric productivity*  
228 *of recombinant proteins. Biotechnol Bioeng.* 2008;100(1):177–83.
- 229 8. **Pfeffer M, Maurer M, Stadlmann J, Grass J, Delic M, et al.** *Intracellular*  
230 *interactome of secreted antibody Fab fragment in Pichia pastoris reveals its routes of*  
231 *secretion and degradation. Appl Microbiol Biotechnol.* 2012;93(6):2503–12.
- 232 9. **Çelik E, Çalik P, Oliver SG.** *Fed-batch methanol feeding strategy for recombinant*  
233 *protein production by Pichia pastoris in the presence of co-substrate sorbitol. Yeast.*

- 234 2009;
- 235 10. **Cregg JM, Vedvick TS, Raschke WC.** *Recent Advances in the Expression of Foreign*  
236 *Genes in Pichia pastoris. Bio/Technology.* 1993;11(8):905–10.
- 237 11. **Fakruddin M, Mazumdar MR, Mannan BKS, Chowdhury A, Hossain MN.**  
238 *Critical Factors Affecting the Success of Cloning, Expression, and Mass Production of*  
239 *Enzymes by Recombinant E. coli. ISRN Biotechnol.* 2013;(3):1–7.
- 240 12. **Pearse A.** *Histochemistry: Theoretical and applied. Am J Med Sci.* 1980;97–158.
- 241 13. **Ash M, Ash I.** *Handbook of Green Chemicals. Synapse Info Resources;* 2004. 1348 p.
- 242 14. **Kumita JR, Johnson RJK, Alcocer MJC, Dumoulin M, Holmqvist F, et al.** *Impact*  
243 *of the native-state stability of human lysozyme variants on protein secretion by Pichia*  
244 *pastoris. FEBS J.* 2006;273:711–20.
- 245 15. **Kissinger CR, Parge HE, Knighton DR, Lewis CT, Pelletier LA, et al.** *Crystal*  
246 *structures of human calcineurin and the human FKBP12-FK506-calcineurin complex.*  
247 *Nature.* 1995;378(6557):641–4.
- 248 16. **Vogel HJ.** *Calcium-Binding Protein Protocols. Vol. 172. Humana Press;* 2002.
- 249
